# Supplementary material for: Synthesis, Characterization and Application of Four Novel Electrochromic Materials Employing Nitrotriphenylamine Unit as the Acceptor and Different Thiophene Derivatives as the Donor
Source: MDPI journal article supplement (doi:10.3390/polym9050173), 2017-05-13
Supplement: s1 [file s1]

**Supporting Information: Synthesis, characterization and application of four novel electrochromic materials employing nitrotriphenylamine unit as the acceptor and different thiophene derivatives as the donor**

Shuai Li<sup>1</sup>, Guoliang Liu<sup>2</sup>, Xiuping Ju<sup>3</sup>, Yan Zhang<sup>1</sup>, Jinsheng Zhao<sup>1,4\*</sup>

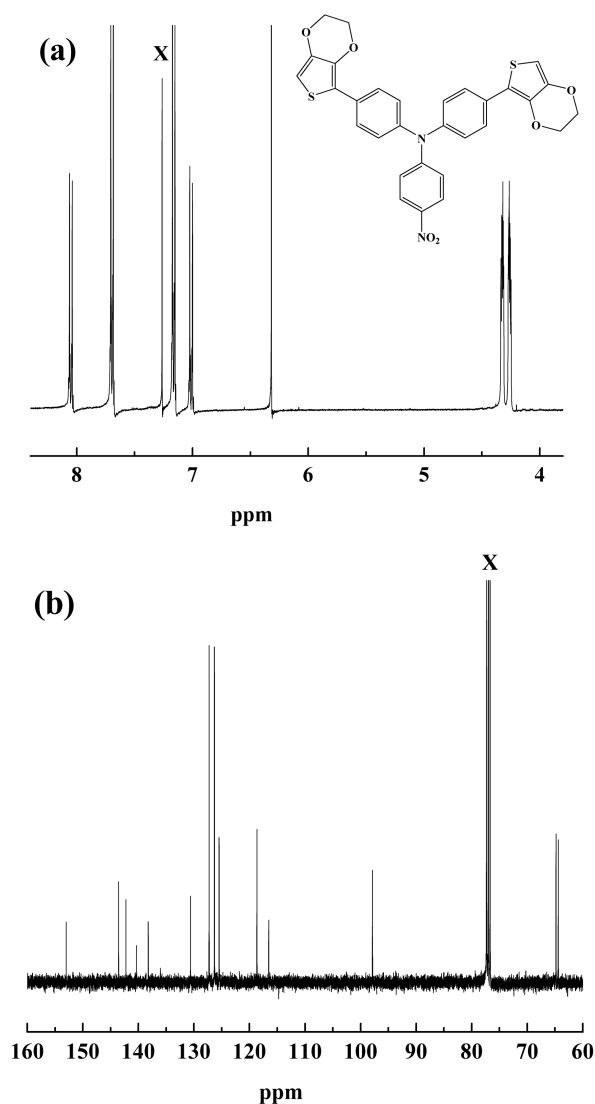

**Fig.S1.** <sup>1</sup>H NMR spectrum of NETPA in CDCl<sub>3</sub> (a). Solvent peak is at  $\delta=7.26$  ppm. <sup>13</sup>C NMR spectrum of NETPA in CDCl<sub>3</sub> (b). Solvent peak is at  $\delta = 77.3$  ppm.

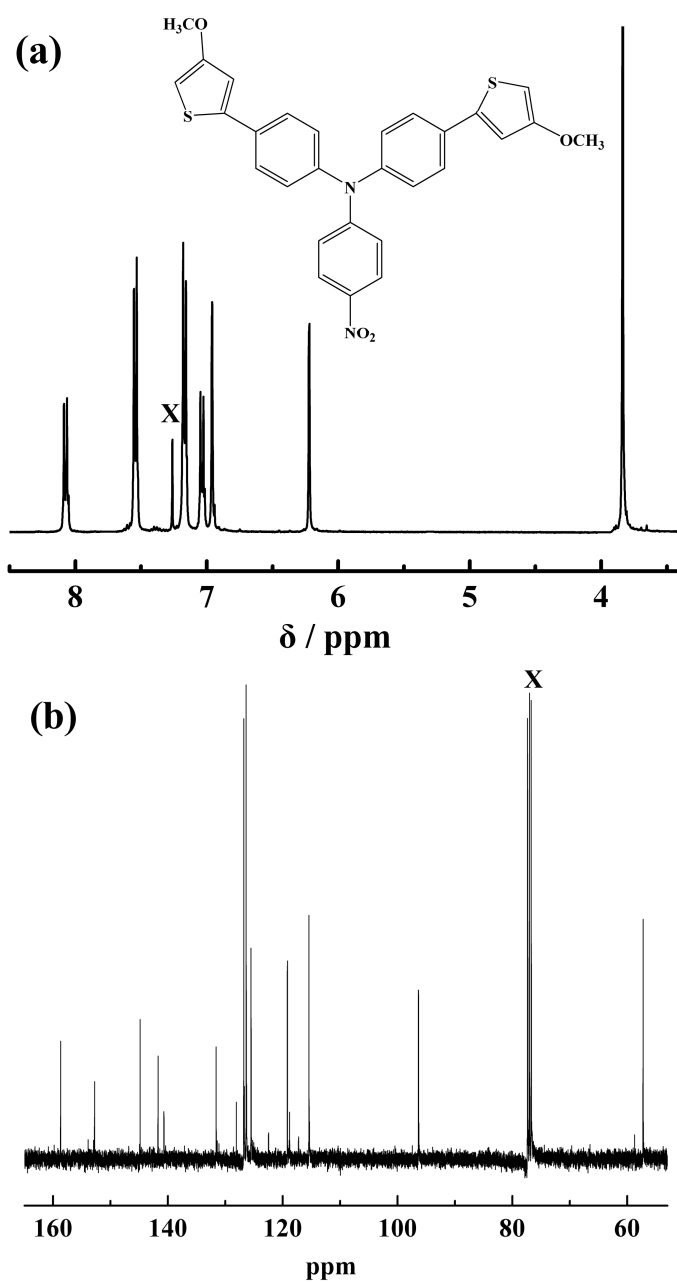

**Fig.S2.**  $^1\text{H}$  NMR spectrum (a) and  $^{13}\text{C}$  NMR spectrum (b) of NMOTPA in  $\text{CDCl}_3$ . The solvent peak in  $^1\text{H}$  NMR is at  $\delta = 7.26$  ppm, and the solvent peak in  $^{13}\text{C}$  NMR spectrum is at  $\delta = 77.3$  ppm.

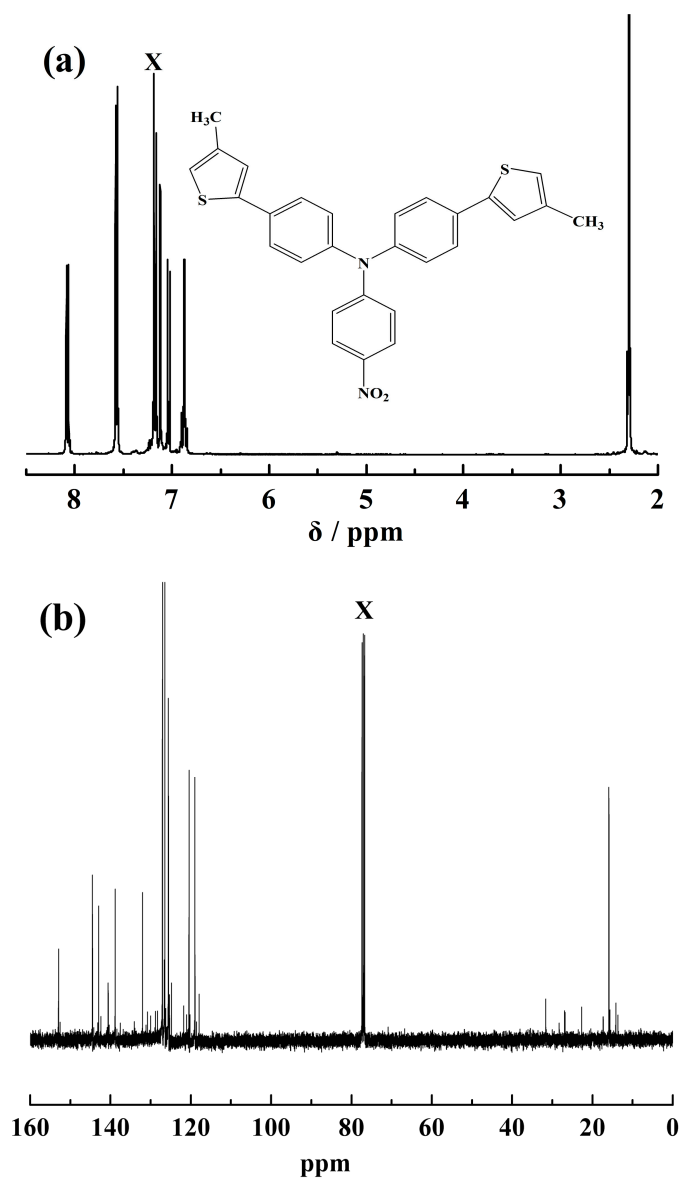

**Fig.S3.**  $^1\text{H}$  NMR spectrum (a) and  $^{13}\text{C}$  NMR spectrum (b) of NMTPA in  $\text{CDCl}_3$ . The solvent peak in  $^1\text{H}$  NMR spectrum is at  $\delta = 7.26$  ppm and the solvent peak in  $^{13}\text{C}$  NMR spectrum peak is at  $\delta = 77.3$  ppm.

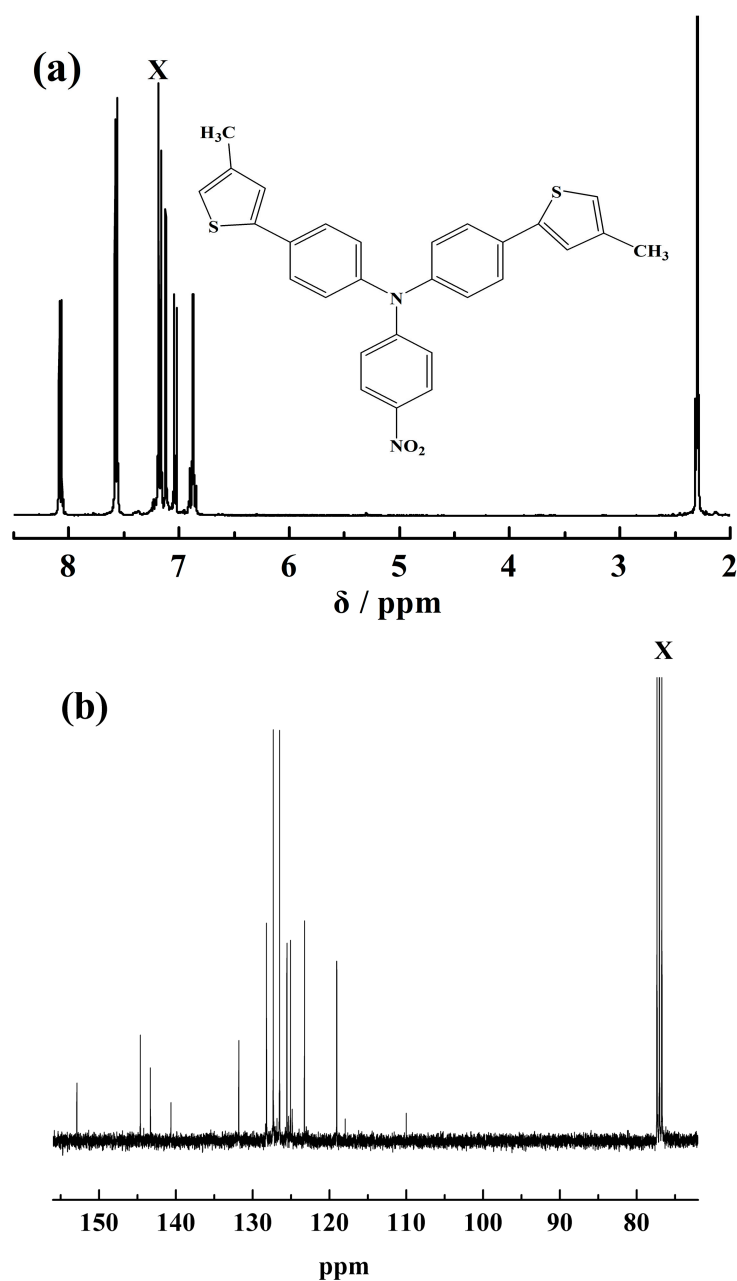

**Fig. S4.**  $^1\text{H}$  NMR spectrum(a) and  $^{13}\text{C}$  NMR spectrum (b) of NTTPA in  $\text{CDCl}_3$ . The solvent peak for  $^1\text{H}$  NMR spectrum is at  $\delta = 7.26$  ppm. The solvent peak in  $^1\text{H}$  NMR spectrum is at  $\delta = 7.26$  ppm and the solvent peak in  $^{13}\text{C}$  NMR spectrum peak is at  $\delta = 77.3$  ppm.

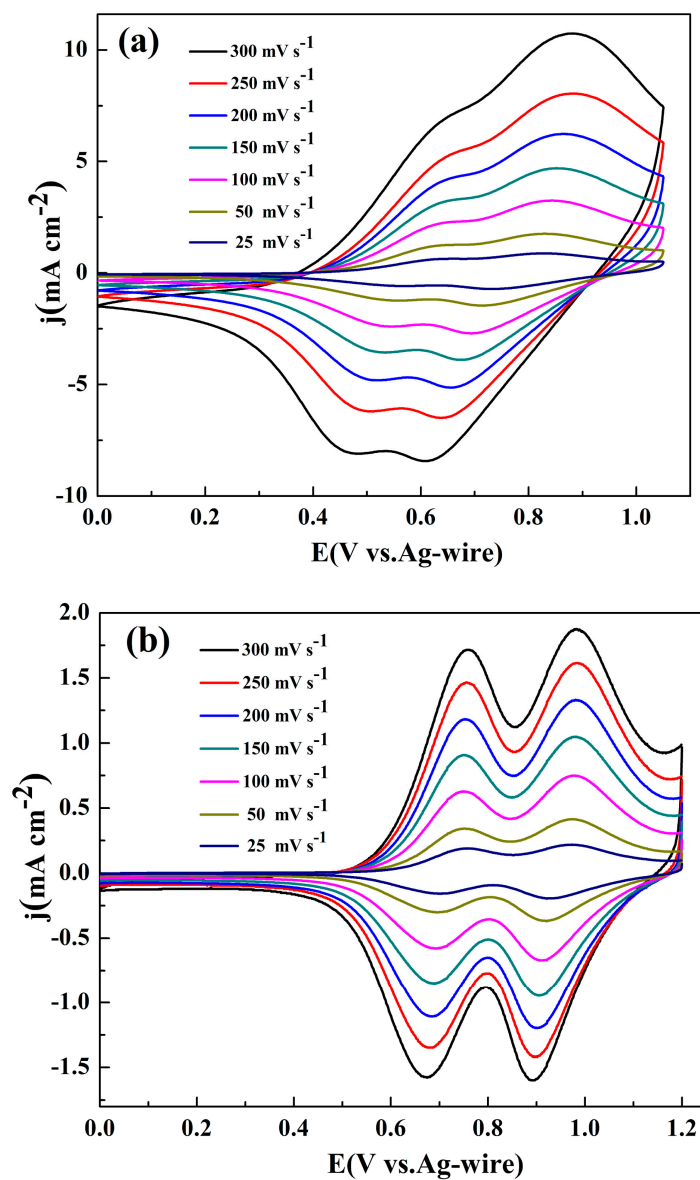

**Fig. S5.** CV curves of the NETPA (a), NMOTPA(b), NMTPA (c) and NTPPA (d) film at different scan rates between 25 mV s<sup>-1</sup> and 300 mV s<sup>-1</sup> in the monomer-free 0.2 M NaClO<sub>4</sub>/ACN/DCM solution.
